# Supplementary material for: One-pot conversion of furfural to alkyl levulinate over bifunctional Au-H4SiW12O40/ZrO2 without external H2
Source: Royal Society of Chemistry journal article supplement (doi:10.1039/c6gc01736c), 2016-01-01
Supplement: c6gc01736c1.pdf [file c6gc01736c1.pdf]

*Electronic Supplementary Information for*

One-pot conversion of furfural to alkyl levulinate over  
bifunctional Au-H<sub>4</sub>SiW<sub>12</sub>O<sub>40</sub>/ZrO<sub>2</sub> without external H<sub>2</sub>

Shanhui Zhu,<sup>\*,a</sup> Youliang Cen,<sup>a,b</sup> Jing Guo,<sup>a,b</sup> Jiachun Chai,<sup>a,b</sup> Jianguo Wang,<sup>a</sup> and

Weibin Fan,<sup>\*,a</sup>

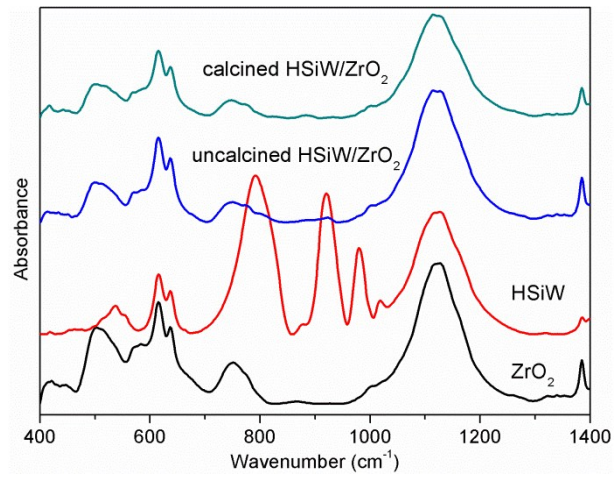

Fig. S1 FTIR spectra of calcined and uncalcined HSiW/ZrO<sub>2</sub>.

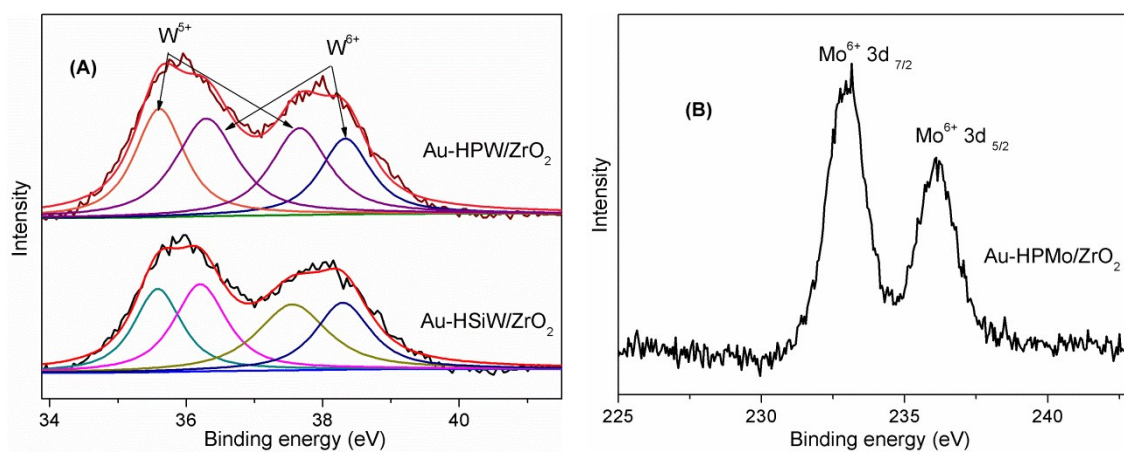

**Fig. S2** (A) W<sup>6+</sup> or W<sup>5+</sup> 4f and (B) Mo<sup>6+</sup> 3d XPS spectra of Au-HPA catalysts.

**Table S1** The total acidity from titration method

| Catalyst         | Au/ZrO <sub>2</sub> | Au-HSiW/ZrO <sub>2</sub> | Au-HPW/ZrO <sub>2</sub> | Au-HPMo/ZrO <sub>2</sub> |
|------------------|---------------------|--------------------------|-------------------------|--------------------------|
| Acidity (mmol/g) | 0.33                | 1.84                     | 1.51                    | 1.10                     |

The procedure of titration method is described below:<sup>S1-S2</sup> 0.25 g catalyst was added into 30 mL 0.05 mol/L NaOH aqueous solution at room temperature under stirring for 60 min. After centrifugal separation, the supernatant solution was titrated by 0.05 mol/L HCl aqueous solution with phenolphthalein as an indicative.

**Table S2** The turnover frequencies based on active Au or acidic sites

| Catalyst                 | TOF <sub>Au</sub> (mol <sub>furfural</sub> ·mol <sub>Au</sub> <sup>-1</sup> ·h <sup>-1</sup> ) | TOF <sub>acidity</sub> (mol <sub>AL</sub> ·mol <sub>acid</sub> <sup>-1</sup> ·h <sup>-1</sup> ) |
|--------------------------|------------------------------------------------------------------------------------------------|-------------------------------------------------------------------------------------------------|
| Au-HSiW/ZrO <sub>2</sub> | 0.188                                                                                          | 0.024                                                                                           |
| Au-HPW/ZrO <sub>2</sub>  | 0.195                                                                                          | 0.018                                                                                           |
| Au-HPMo/ZrO <sub>2</sub> | 0.174                                                                                          | 0.010                                                                                           |

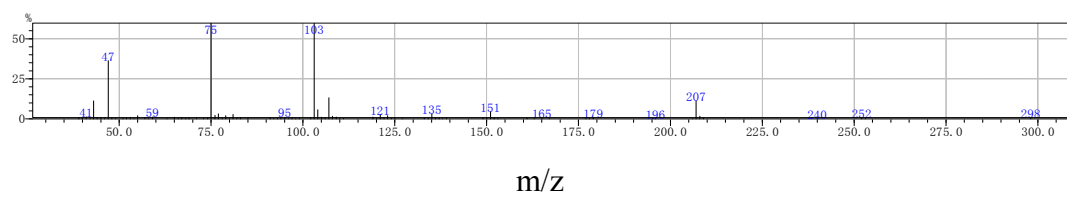

**Fig. S3** The possible GC-MS data of TPP.

## References:

- S1 J. Wang, W. Xu, J. Ren, X. Liu, G. Lu and Y. Wang, *Green Chem.*, 2011, **13**, 2678–2681.
- S2 P. P. Upare, J. Yoon, M. Y. Kim, H. Kang, D. W. Hwang, Y. K. Hwang, H. H. Kung and J. Chang, *Green Chem.*, 2013, **15**, 2935–2943.
